# Supplementary material for: Distinct climate influences on the risk of typhoid compared to invasive non-typhoid Salmonella disease in Blantyre, Malawi
Source: Sci Rep. 2019 Dec 30;9:20310. doi: 10.1038/s41598-019-56688-1 (PMC6937328; doi:10.1038/s41598-019-56688-1)
Supplement: Supplementary file 1 — Supplementary information. [file 41598_2019_56688_MOESM1_ESM.pdf]

# **Distinct climate influences on the risk of typhoid compared to invasive non-typhoid *Salmonella* disease in Blantyre, Malawi.**

Authors: Deus Thindwa<sup>1,2,\*</sup>, Michael G. Chipeta<sup>1,3,6</sup>, Marc Y.R. Henrion<sup>1,4</sup>, Melita A. Gordon<sup>1,5,6</sup>.

## Affiliations

<sup>1</sup> Malawi-Liverpool-Wellcome Trust Clinical Research Programme, Blantyre, Malawi.

<sup>2</sup> Centre for Mathematical Modelling of Infectious Diseases, Department of Infectious Disease Epidemiology, London School of Hygiene and Tropical Medicine, London, United Kingdom.

<sup>3</sup> Nuffield Department of Medicine, Big Data Institute, Oxford University, Oxford, United Kingdom.

<sup>4</sup> Department of Clinical Sciences, Liverpool School of Tropical Medicine, Liverpool, United Kingdom.

<sup>5</sup> Institute of Infection and Global Health, University of Liverpool, Liverpool, United Kingdom.

<sup>6</sup> Malawi College of Medicine, University of Malawi, Blantyre, Malawi.

\* Email: [deus.thindwa@gmail.com](mailto:deus.thindwa@gmail.com)

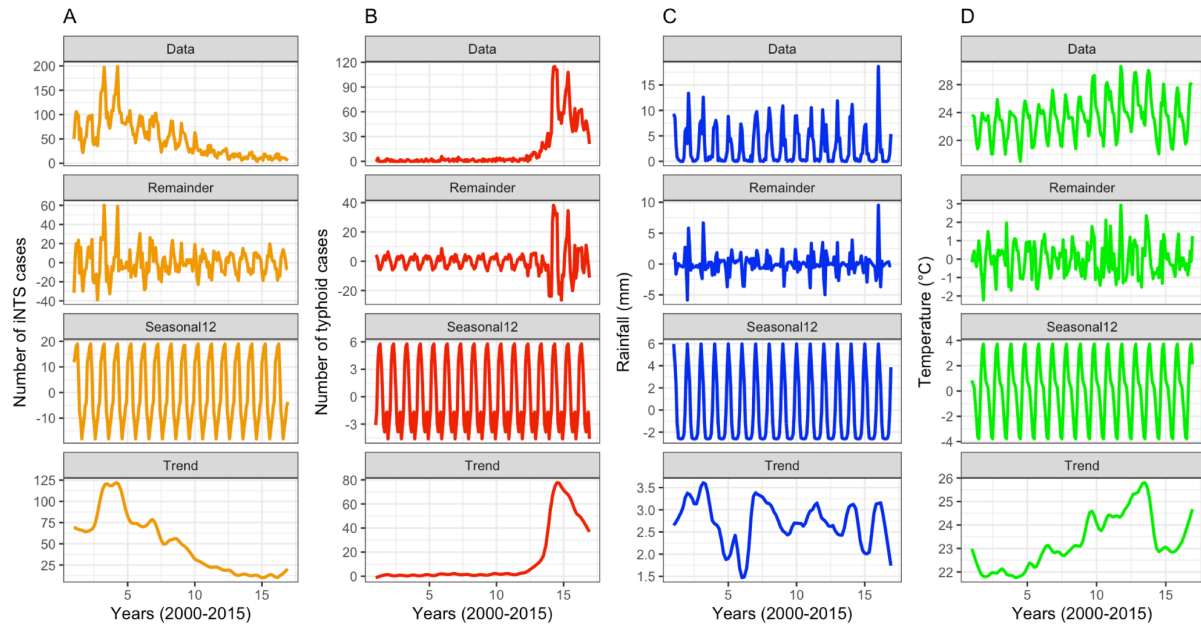

Supplementary Figure S1. Decomposition of monthly time series from years 2000 to 2015. Invasive nontyphoid *Salmonella* (iNTS) (A), typhoid (B), rainfall (C), and temperature (D) time series data from Blantyre, Malawi are decomposed into remainder, monthly seasonal, and trend components separately.

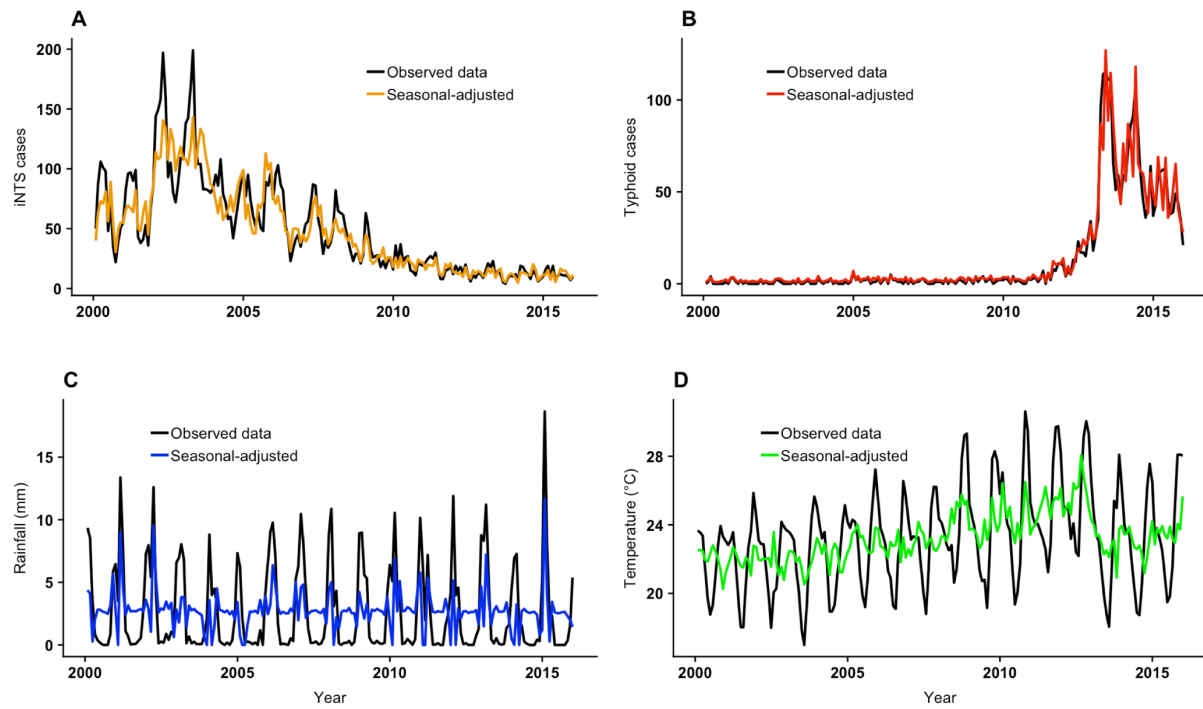

Supplementary Figure S2. Seasonal-unadjusted versus seasonal-adjusted monthly time series.

Invasive nontyphoid (iNTS) (A), typhoid (B), rainfall (C), and temperature (D) time series data from Blantyre, Malawi over a period of 16 years.

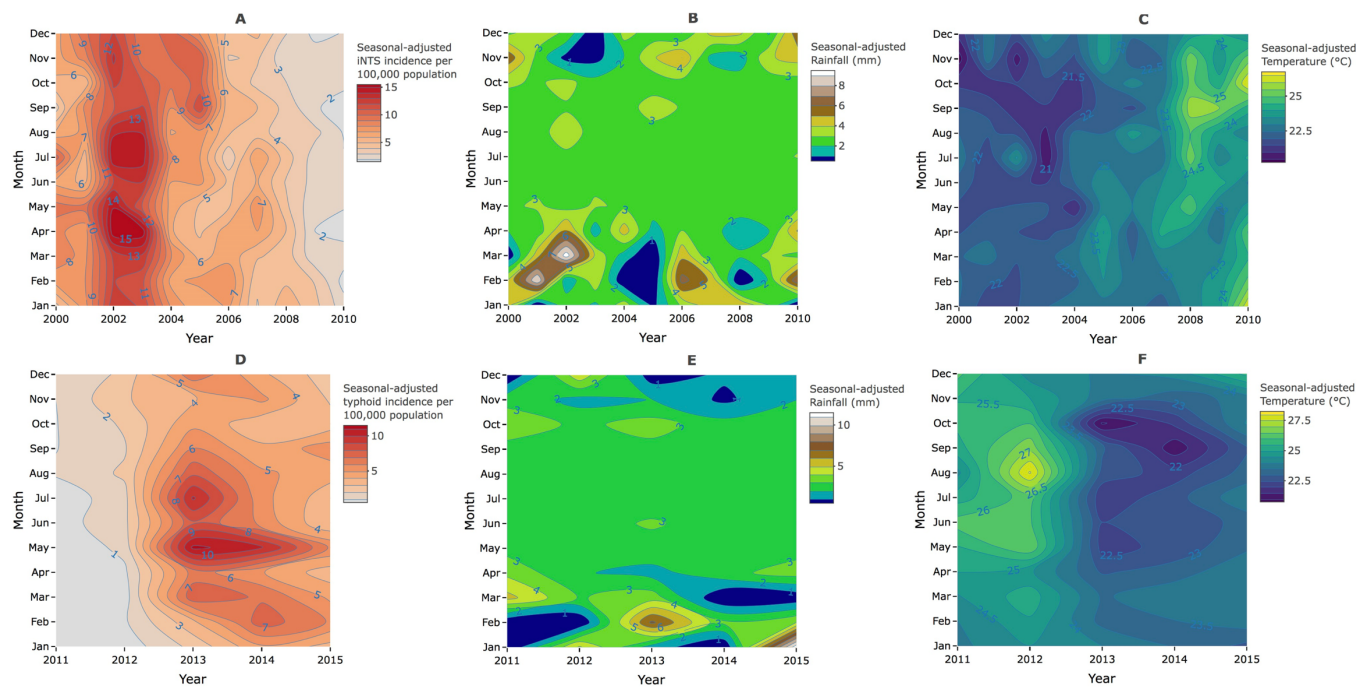

Supplementary Figure S3. Seasonal-adjusted annual cycle of *Salmonella* incidence rates and climate.

Dynamics of invasive nontyphoid *Salmonella* incidence (iNTS) (A), rainfall (B) temperature (C) over 11 years (between years 2000 and 2010), and typhoid cases (D), rainfall (E) and temperature (F) over 5 years (between years 2011 and 2015) following monthly seasonal-adjustment using time series data from Blantyre, Malawi.

| Model | $w(l)$ | $f(x_1)$ | $f(x_2)$ | iNTS <sub>R</sub> | iNTS <sub>T</sub> | iNTS      | Typhoid <sub>R</sub> | Typhoid <sub>T</sub> | Typhoid   |
|-------|--------|----------|----------|-------------------|-------------------|-----------|----------------------|----------------------|-----------|
| #     | $df$   | $df$     | $df$     | $Q-AIC$           | $Q-AIC$           | $Q-AIC$   | $Q-AIC$              | $Q-AIC$              | $Q-AIC$   |
| 1     | 3      | 3        | 3        | 570.7089          | 580.4330          | 567.9318* | 212.1887             | 222.8303             | 210.6648* |
| 2     | 4      | 3        | 3        | 574.2819          | 585.1239          | 578.3531  | 217.4634             | 212.1270             | 217.8383  |
| 3     | 5      | 3        | 3        | 580.2446          | 589.3765          | 587.3423  | 222.4061             | 216.4683             | 228.4523  |
| 4     | 3      | 4        | 3        | 574.4757          | 580.4330          | 572.1161  | 204.9102*            | 222.8303             | 214.0661  |
| 5     | 4      | 4        | 3        | 579.8267          | 585.1239          | 584.5922  | 212.4587             | 212.1270             | 224.8071  |
| 6     | 5      | 4        | 3        | 587.5728          | 589.3765          | 595.1572  | 216.0560             | 216.4683             | 236.6332  |
| 7     | 3      | 5        | 3        | 573.9352          | 580.4330          | 568.5534  | 209.8391             | 222.8303             | 217.8914  |
| 8     | 4      | 5        | 3        | 580.8374          | 585.1239          | 583.1928  | 216.7759             | 212.1270             | 230.4198  |
| 9     | 5      | 5        | 3        | 590.4370          | 589.3765          | 594.1826  | 222.3633             | 216.4683             | 245.0488  |
| 10    | 3      | 3        | 4        | 570.7089          | 585.5078          | 570.8126  | 212.1887             | 226.2686             | 212.3317  |
| 11    | 4      | 3        | 4        | 574.2819          | 588.9740          | 582.0334  | 217.4634             | 219.7139             | 223.4347  |
| 12    | 5      | 3        | 4        | 580.2446          | 587.7656          | 591.6384  | 222.4061             | 224.9809             | 236.3496  |
| 13    | 3      | 4        | 4        | 574.4757          | 585.5078          | 573.3518  | 204.9102             | 226.2686             | 217.9361  |
| 14    | 4      | 4        | 4        | 579.8267          | 588.9740          | 587.5944  | 212.4587             | 219.7139             | 231.2642  |
| 15    | 5      | 4        | 4        | 587.5728          | 587.7656          | 600.0265  | 216.0560             | 224.9809             | 245.6914  |
| 16    | 3      | 5        | 4        | 587.5728          | 585.5078          | 573.7475  | 209.8391             | 226.2686             | 221.1059  |
| 17    | 4      | 5        | 4        | 580.8374          | 588.9740          | 590.1806  | 216.7759             | 219.7139             | 237.9325  |
| 18    | 5      | 5        | 4        | 590.4370          | 587.7656          | 602.4179  | 222.3633             | 224.9809             | 253.1268  |
| 19    | 3      | 3        | 5        | 570.7089          | 584.5078          | 571.3729  | 212.1887             | 218.5320             | 217.8403  |
| 20    | 4      | 3        | 5        | 574.2819          | 592.4074          | 582.8894  | 217.4634             | 213.9474             | 231.1740  |
| 21    | 5      | 3        | 5        | 580.2446          | 590.6842          | 594.6393  | 222.4061             | 222.1824             | 245.2023  |
| 22    | 3      | 4        | 5        | 574.4757          | 584.5078          | 575.8213  | 204.9102             | 218.5320             | 223.3430  |
| 23    | 4      | 4        | 5        | 579.8267          | 592.4074          | 590.1457  | 212.4587             | 213.9474             | 238.9668  |
| 24    | 5      | 4        | 5        | 587.5728          | 590.6842          | 603.8391  | 216.0560             | 222.1824             | 254.4714  |
| 25    | 3      | 5        | 5        | 573.9352          | 584.5078          | 578.8830  | 209.8391             | 218.5320             | 227.2069  |
| 26    | 4      | 5        | 5        | 580.8374          | 592.4074          | 595.8418  | 216.7759             | 213.9474             | 245.8361  |
| 27    | 5      | 5        | 5        | 590.4370          | 590.6842          | 610.4309  | 222.3633             | 222.1824             | 260.6858  |

Supplementary Table S1. Natural cubic spline functions for monthly rainfall  $f(x_1)$ , monthly temperature  $f(x_2)$  and monthly lag  $w(l)$ . Individual degrees of freedom ( $df$ ) associated with cross-basis matrix in the exposure-lag space, and values for the Quasi-Akaike Information Criterion (Q-AIC) for the alternative models for the association between invasive nontyphoid disease and rainfall (iNTS<sub>R</sub>) or temperature (iNTS<sub>T</sub>) or both (iNTS) from year 2000 to 2010, and for the association between typhoid and rainfall (Typhoid<sub>R</sub>) or temperature (Typhoid<sub>T</sub>) or both (Typhoid) from year

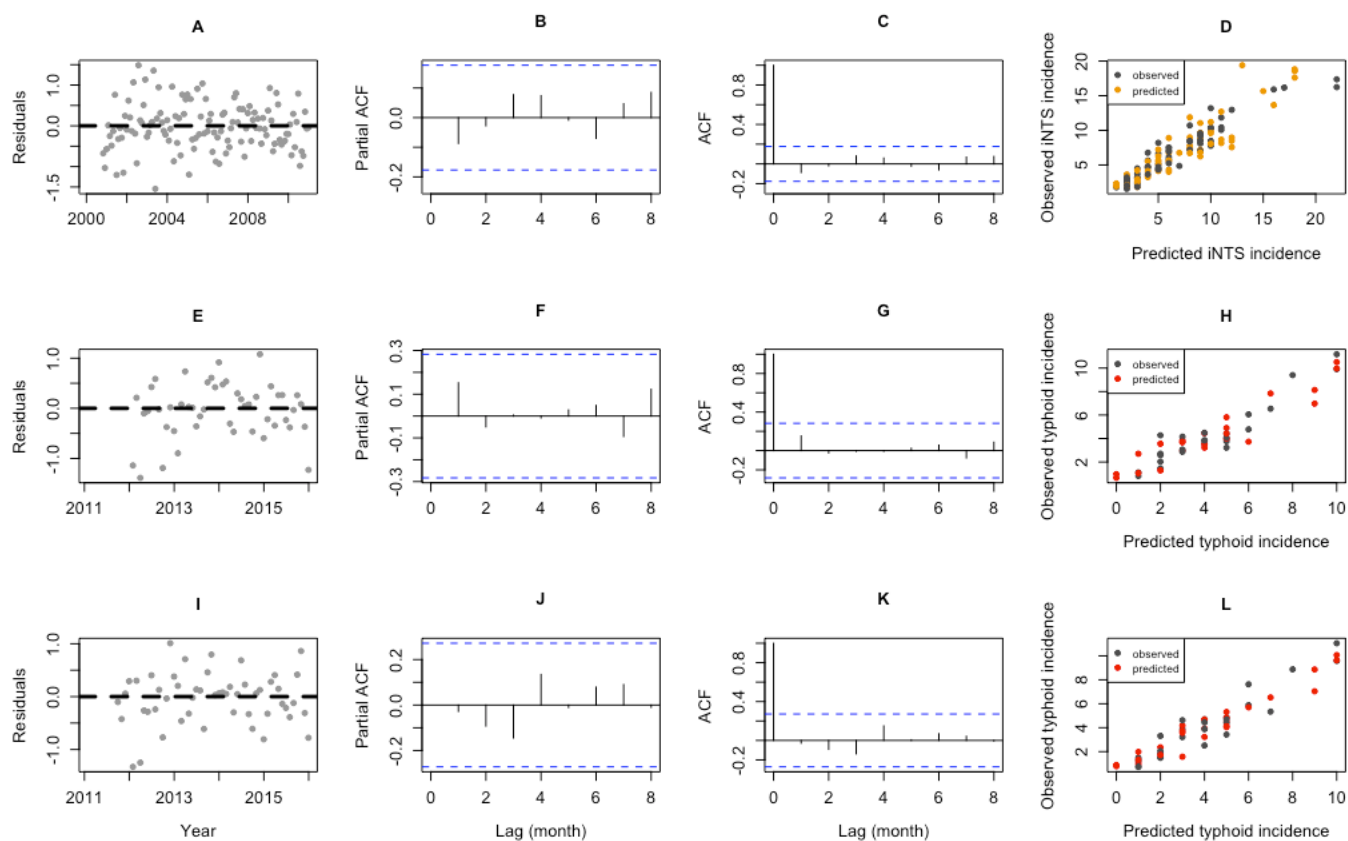

Supplementary Figure S4. Model validation checks. Deviance residuals overtime, partial autocorrelation (partial ACF), autocorrelation (ACF) and model predictions respectively, estimated by; adjusted model (additional residuals at lag 1) of bi-dimensional association between rainfall-lag and temperature-lag and invasive nontyphoid *Salmonella* (iNTS) (A,B,C,D), adjusted model (additional residuals at lag 4) of bi-dimensional association between rainfall-lag and typhoid (E,F,G,H), and original model of bi-dimensional association between temperature-lag and rainfall-lag and typhoid (I,J,K,L).

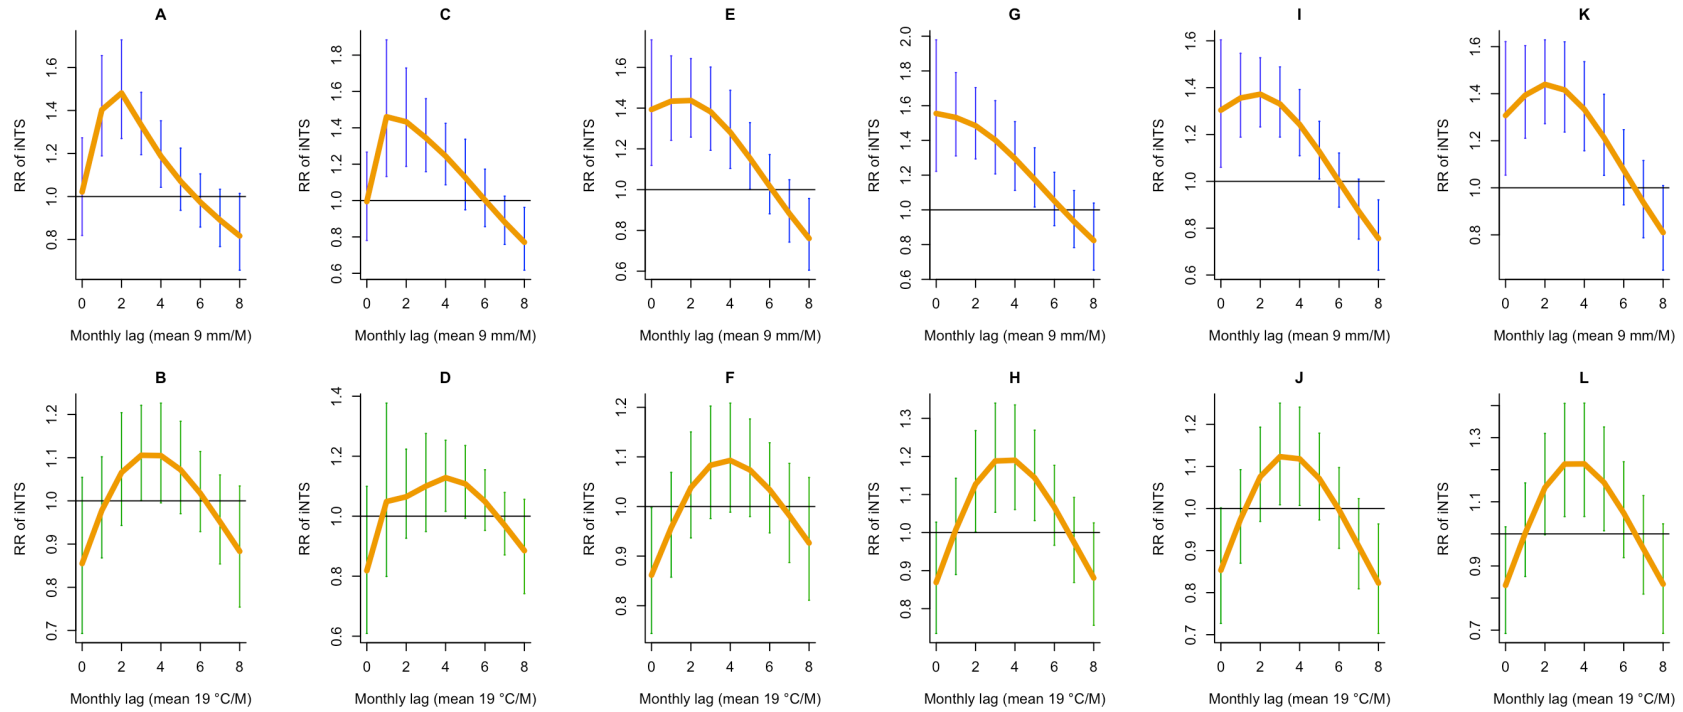

Supplementary Figure S5. Sensitivity analysis. The effects on invasive nontyphoid *Salmonella* (iNTS) of mean 9 mm/month (mm/M) rainfall relative to 0 mm and mean 19 °C/month (°C /M) temperature relative to 23 °C along the lags, varied by increasing degrees of freedom ( $df$ ) in the lag space from ( $df=4$ ; model 2; A,B) to ( $df=5$ ; model 3; C,D), in the rainfall space from ( $df=4$ ; model 4; E,F) to ( $df=5$ ; model 7; G,H), and in the temperature space from ( $df=4$ ; model 10; I,J) to ( $df=5$ ; model 19; K,L).

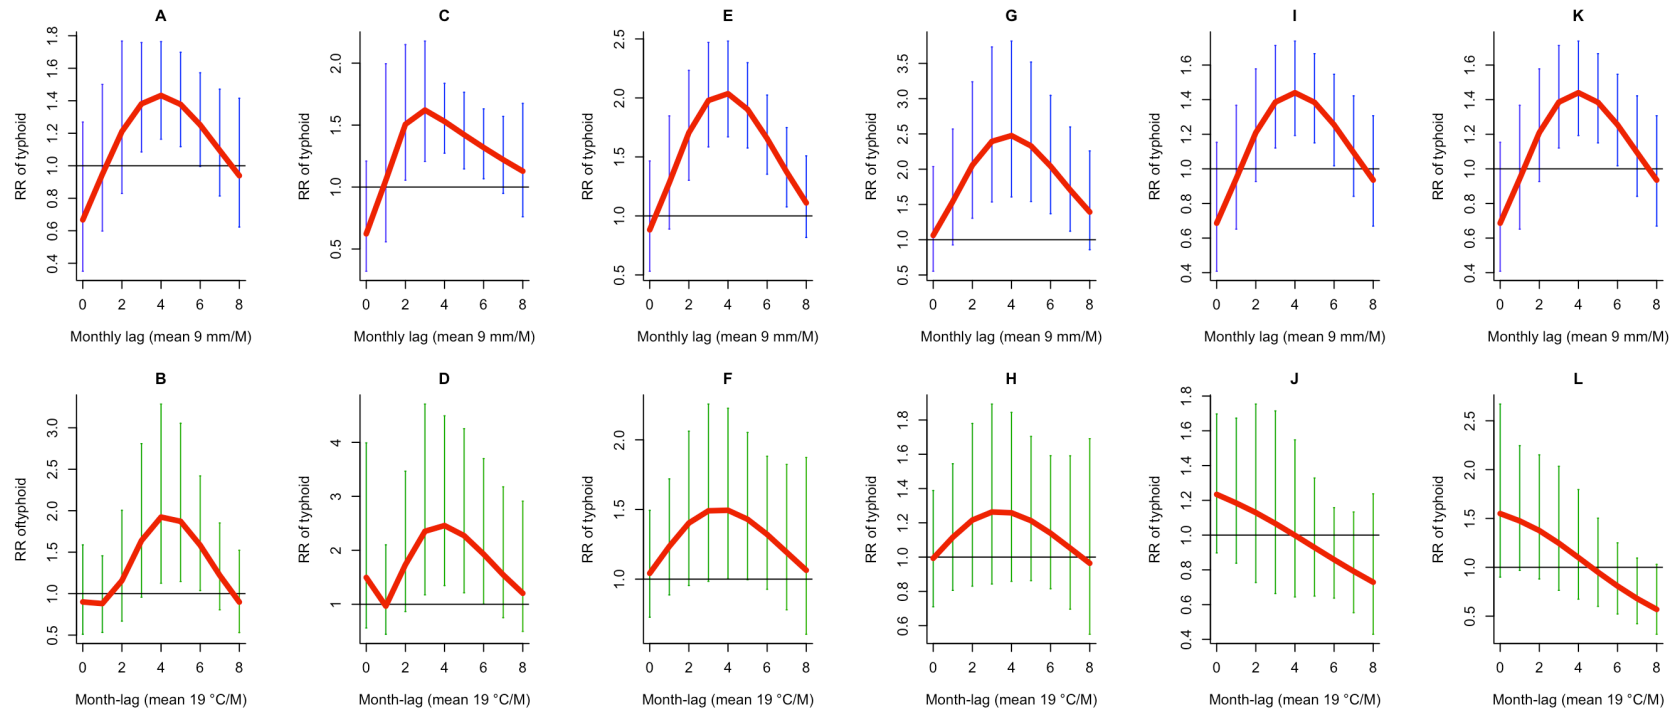

Supplementary Figure S6. Sensitivity analysis. The effects on typhoid of mean 9 mm/month (mm/M) rainfall relative to 0 mm and mean 19 °C/month (°C/M) temperature relative to 23 °C along the lags, varied by increasing the degree of freedom ( $df$ ) in the lag space from ( $df=4$ ; model 2; A,B) to ( $df=5$ ; model 3; C,D), in the rainfall space from ( $df=4$ ; model 4; E,F) to ( $df=5$ ; model 7; G,H), and in the temperature space from ( $df=4$ ; model 10; I,J) to ( $df=5$ ; model 19; K,L).

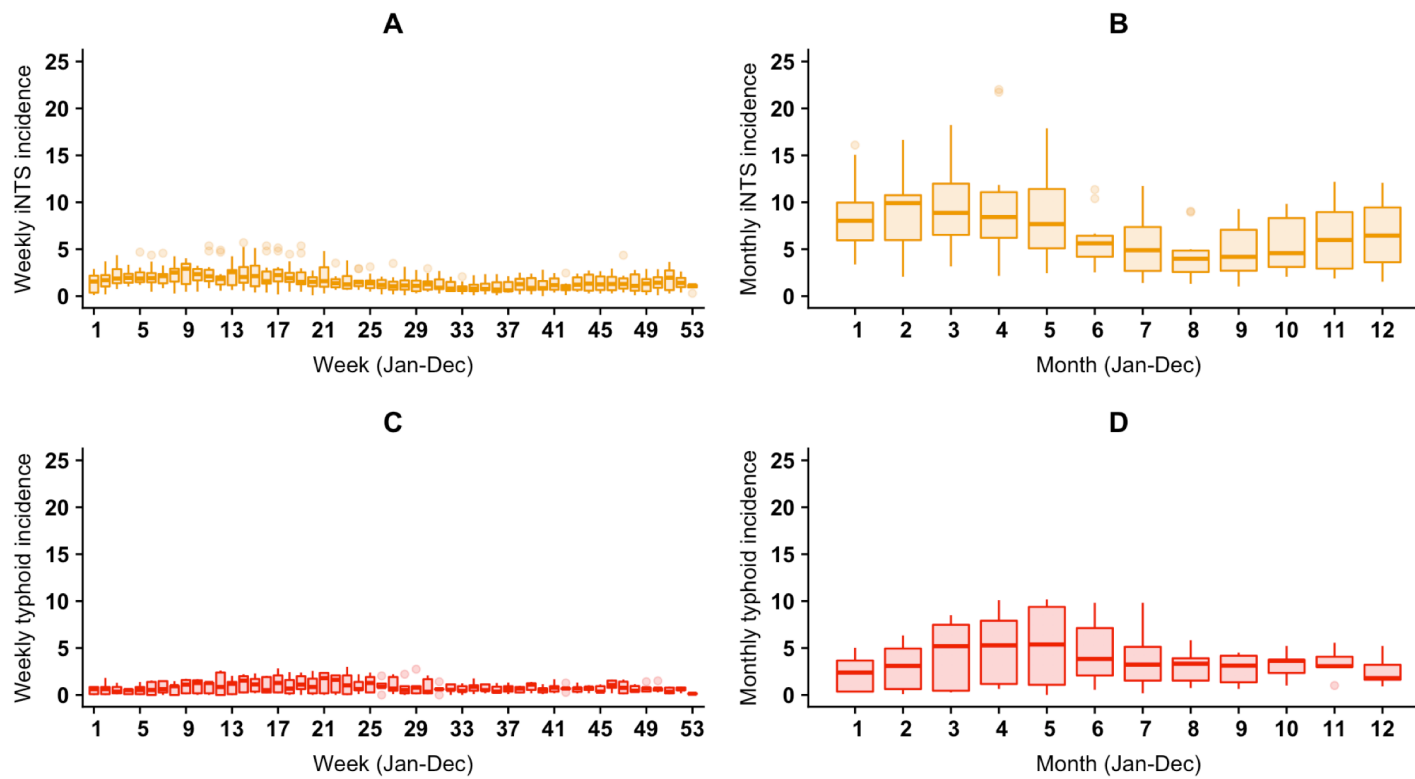

Supplementary Figure S7. Weekly versus monthly seasonal-unadjusted incidence of invasive *Salmonella* diseases. Weekly and monthly incidence of invasive nontyphoid *Salmonella* over 11 years (A and B) and typhoid over 5 years (C and D), respectively.

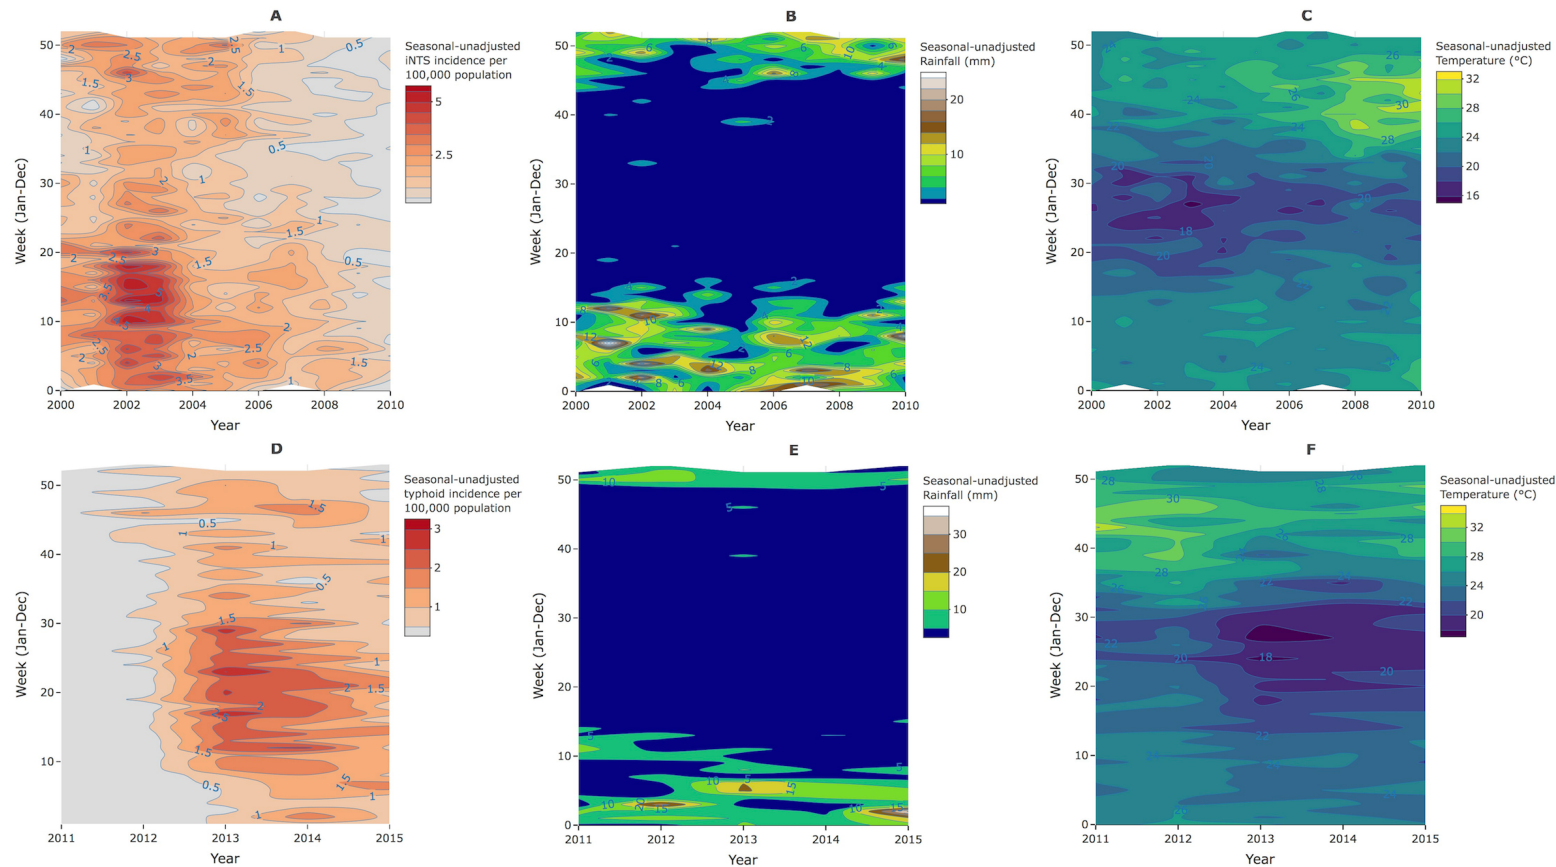

Supplementary Figure S8. Weekly seasonal-unadjusted annual cycle of *Salmonella* incidence rates and climate. Weekly dynamics of invasive nontyphoid *Salmonella* incidence (iNTS) (A), rainfall (B) temperature (C) over 11 years (between years 2000 and 2010), and typhoid cases (D), rainfall (E) and temperature (F) over 5 years (between years 2011 and 2015) using time series data from Blantyre, Malawi.

| model.no | lag.df | fx1.df | fx2.df | QAIC.ntsR | QAIC.ntsT | QAIC.nts | QAIC.typR | QAIC.typT | QAIC.typ |
|----------|--------|--------|--------|-----------|-----------|----------|-----------|-----------|----------|
| 1        | 3      | 3      | 3      | 1524.757  | 1519.700  | 1531.143 | 540.9125  | 531.7717  | 545.3841 |
| 2        | 4      | 3      | 3      | 1530.390  | 1522.270  | 1539.625 | 546.5628  | 536.6449  | 555.6807 |
| 3        | 5      | 3      | 3      | 1535.525  | 1525.789  | 1548.621 | 552.1588  | 542.4188  | 566.6796 |
| 4        | 3      | 4      | 3      | 1530.054  | 1519.700  | 1536.337 | 546.8450  | 531.7717  | 551.4437 |
| 5        | 4      | 4      | 3      | 1536.947  | 1522.270  | 1546.137 | 554.3891  | 536.6449  | 563.5952 |
| 6        | 5      | 4      | 3      | 1544.099  | 1525.789  | 1557.163 | 562.0286  | 542.4188  | 576.5845 |
| 7        | 3      | 5      | 3      | 1534.200  | 1519.700  | 1539.776 | 544.4189  | 531.7717  | 548.4657 |
| 8        | 4      | 5      | 3      | 1541.237  | 1522.270  | 1550.055 | 553.8608  | 536.6449  | 562.7434 |
| 9        | 5      | 5      | 3      | 1550.509  | 1525.789  | 1563.216 | 563.4763  | 542.4188  | 577.7582 |
| 10       | 3      | 3      | 4      | 1524.757  | 1520.694  | 1532.983 | 540.9125  | 536.3786  | 548.7937 |
| 11       | 4      | 3      | 4      | 1530.390  | 1525.057  | 1543.237 | 546.5628  | 543.4552  | 561.3984 |
| 12       | 5      | 3      | 4      | 1535.525  | 1530.582  | 1554.033 | 552.1588  | 550.9330  | 574.3019 |
| 13       | 3      | 4      | 4      | 1530.054  | 1520.694  | 1538.034 | 546.8450  | 536.3786  | 555.0159 |
| 14       | 4      | 4      | 4      | 1536.947  | 1525.057  | 1549.584 | 554.3891  | 543.4552  | 569.5439 |
| 15       | 5      | 4      | 4      | 1544.099  | 1530.582  | 1562.322 | 562.0286  | 550.9330  | 584.4541 |
| 16       | 3      | 5      | 4      | 1534.200  | 1520.694  | 1541.870 | 544.4189  | 536.3786  | 551.2130 |
| 17       | 4      | 5      | 4      | 1541.237  | 1525.057  | 1553.874 | 553.8608  | 543.4552  | 567.8638 |
| 18       | 5      | 5      | 4      | 1550.509  | 1530.582  | 1568.705 | 563.4763  | 550.9330  | 584.8132 |
| 19       | 3      | 3      | 5      | 1524.757  | 1525.748  | 1538.441 | 540.9125  | 541.2480  | 554.7443 |
| 20       | 4      | 3      | 5      | 1530.390  | 1531.911  | 1550.446 | 546.5628  | 550.1579  | 569.1694 |
| 21       | 5      | 3      | 5      | 1535.525  | 1539.070  | 1562.984 | 552.1588  | 559.4527  | 583.7914 |
| 22       | 3      | 4      | 5      | 1530.054  | 1525.748  | 1543.752 | 546.8450  | 541.2480  | 560.9574 |
| 23       | 4      | 4      | 5      | 1536.947  | 1531.911  | 1557.137 | 554.3891  | 550.1579  | 577.3095 |
| 24       | 5      | 4      | 5      | 1544.099  | 1539.070  | 1571.667 | 562.0286  | 559.4527  | 593.9266 |
| 25       | 3      | 5      | 5      | 1534.200  | 1525.748  | 1547.426 | 544.4189  | 541.2480  | 557.3518 |
| 26       | 4      | 5      | 5      | 1541.237  | 1531.911  | 1561.154 | 553.8608  | 550.1579  | 575.7929 |
| 27       | 5      | 5      | 5      | 1550.509  | 1539.070  | 1577.779 | 563.4763  | 559.4527  | 594.2512 |

Supplementary Table S2. Natural cubic spline functions for weekly rainfall ( $fx1.df$ ), weekly temperature ( $fx2.df$ ) and weekly lag ( $lag.df$ ). Individual degrees of freedom ( $df$ ) associated with cross-basis matrix in the exposure-lag space, and values for the Quasi-Akaike Information Criterion (QAIC) for the alternative models for the association between invasive nontyphoid disease and rainfall (QAIC.ntsR) or temperature (QAIC.ntsT) or both (QAIC.nts) from year 2000 to 2010, and for the association between typhoid and rainfall (QAIC.typR) or temperature (QAIC.typT) or both (QAIC.typ) from year 2011-2015 in Blantyre, Malawi.

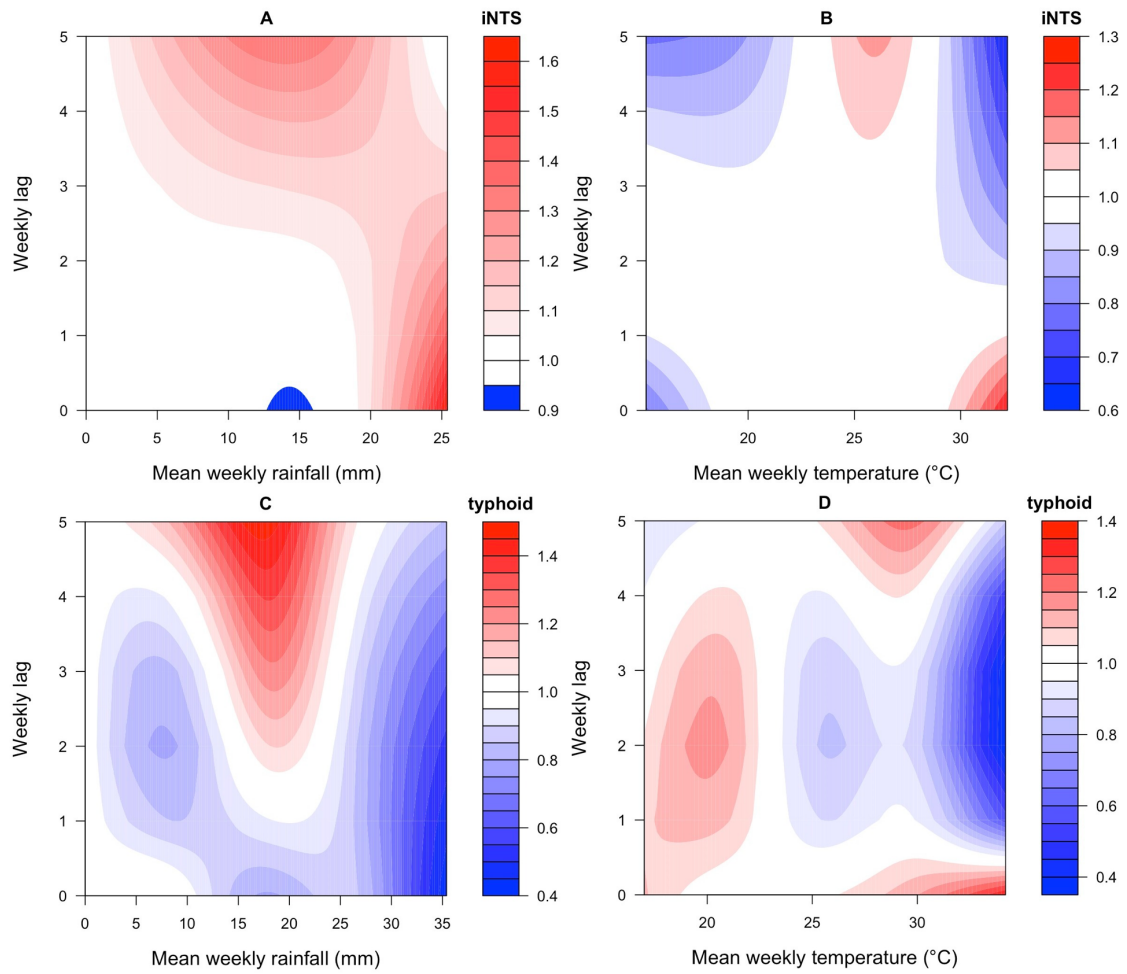

Supplementary Figure S9. Relative risk of invasive *Salmonella* diseases given rainfall and temperature exposures, and weekly lags. Contour plots of rainfall-lag-invasive nontyphoid *Salmonella* (iNTS) risk (A), temperature-lag-invasive nontyphoid *Salmonella* (iNTS) risk (B), rainfall-lag-typhoid risk (C), temperature-lag-typhoid risk (D).
